# Supplementary material
Source: Springer Nature journal article supplement (https://www.springermedizin.de/resource/supplementary/12885_2014_4804_MOESM2_ESM.pdf/9467364)
Supplement: MOESM2 [file 9467364]

## Additional File 2: Correlative mRNA levels of TARS and VEGF in ovarian cancer patients

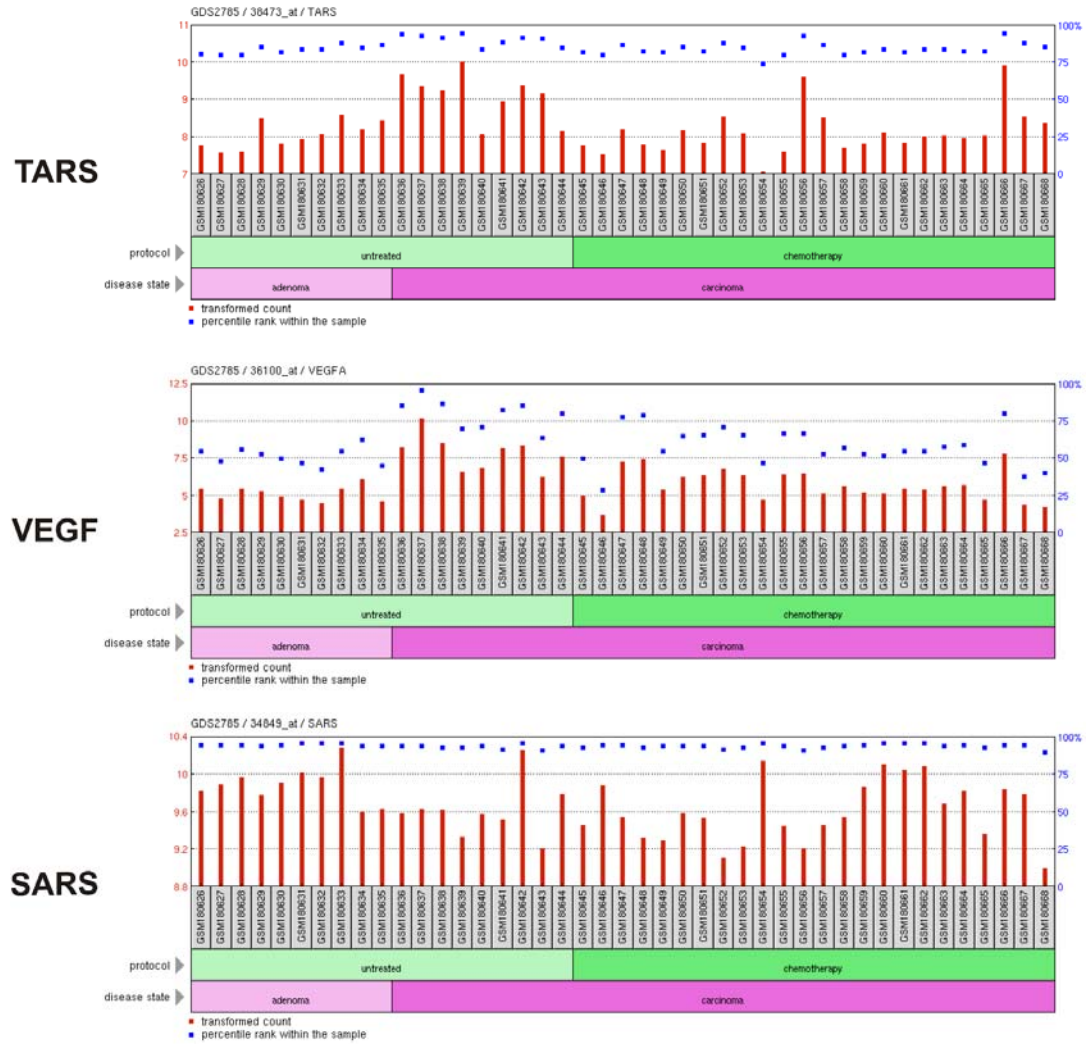

Shown are GEO datasets representing mRNA GeneChip expression profiles of TARS, VEGF and SARS in ovarian cancer patients. Patient categories included untreated adenoma (benign conditions), untreated carcinoma (papillary serous adenocarcinoma), and chemotherapy carcinoma (patients treated with carboplatin/paclitaxel therapy prior to surgery). Data were obtained from GEO accession GDS2785. Analysis of the raw data is shown in **Fig. 1**.
